# Supplementary material for: Phase II Drug-Metabolizing Polymorphisms and Smoking Predict Recurrence of Non–Muscle-Invasive Bladder Cancer: A Gene–Smoking Interaction
Source: Oxford University Press journal article supplement (doi:10.1158/1940-6207.capr-15-0069), 2015-12-09
Supplement: 19406207capr150069-sup-145546_2_table_3177932_nvwtht.docx [file 19406207capr150069-sup-145546_2_table_3177932_nvwtht.docx]

Supplementary Table S1: Baseline characteristics and relation to recurrence

| Variables | Cohort | No recurrence (%) | Recurrence (%) | P values |
| --- | --- | --- | --- | --- |
| Number of patients | 189 | 66 (34.9) | 123 (65.1) |  |
|  |  |  |  |  |
| Age (yr) | 62.8 |  |  | 0.674 |
| <60 | 65 | 20 (30,8) | 45 (69.2) |  |
| 60-70 | 69 | 25 (36.2) | 44 (63.8) |  |
| >70 | 55 | 21 (38.2) | 34 (61.8) |  |
|  |  |  |  |  |
| Smoking exposure |  |  |  | 0.001 |
| Non-smokers | 30 | 19 (63.3) | 11 (36.6) |  |
| 1-20 c/d | 75 | 26 (34.7) | 49 (65.3) |  |
| >20 c/d | 84 | 21 (25.0) | 63 (75.0) |  |
|  |  |  |  |  |
| Smoking exposure |  |  |  | 0.008 |
| Non-smokers | 30 | 19 (63.3) | 11 (36.6) |  |
| Previous smokers | 67 | 20 (29.9) | 47 (70.1) |  |
| Current smokers | 92 | 27 (29.3) | 65 (70.7) |  |
|  |  |  |  |  |
| Stage |  |  |  | 0.161 |
| pTa | 146 | 55 (37.7) | 91 (62.3) |  |
| pT1 | 43 | 11 (25.6) | 32 (74.4) |  |
|  |  |  |  |  |
| Grade |  |  |  | 0.073 |
| 1 | 59 | 26 (44.1) | 33 (55.9) |  |
| 2 | 110 | 37 (33.6) | 73 (66.4) |  |
| 3 | 20 | 3 (15.0) | 17 (85.0) |  |
|  |  |  |  |  |
| *UGT1A1* |  |  |  | 0.091 |
| *UGT1A1*1/*1* | 98 | 34 (34.7) | 64 (65.3) |  |
| *UGT1A1*1/*28* | 73 | 28 (38.4) | 45 (61.6) |  |
| *UGT1A1*28/*28* | 14 | 2 (14.3) | 12 (85.7) |  |
|  |  |  |  |  |
| *GSTM 1* |  |  |  | 0.0005 |
| + / + | 9 | 8 (88.9) | 1 (11.1) |  |
| + / - | 65 | 20 (30.8) | 45 (69.2) |  |
| - / - | 106 | 34 (32.1) | 72 (67.9) |  |
|  |  |  |  |  |

c/d : cigarettes/day
